# Supplementary material
Source: publisher figshare collection journal article supplement (https://asha.figshare.com/ndownloader/files/28405179)
Supplement: Supplementary file 1 [file 28405179]

5. What language(s) *do you* use in the following **places**?

|                                                              | 1                        | 2                                   | 3                              | 4                                   | 5                        | 6                        | 7                        |
|--------------------------------------------------------------|--------------------------|-------------------------------------|--------------------------------|-------------------------------------|--------------------------|--------------------------|--------------------------|
| Situations                                                   | English always           | Mostly English sometimes Vietnamese | English and Vietnamese equally | Mostly Vietnamese sometimes English | Vietnamese always        | Another language         | Not applicable           |
| a) At work                                                   | <input type="checkbox"/> | <input type="checkbox"/>            | <input type="checkbox"/>       | <input type="checkbox"/>            | <input type="checkbox"/> | <input type="checkbox"/> | <input type="checkbox"/> |
| b) When studying (at school/ university/ college)            | <input type="checkbox"/> | <input type="checkbox"/>            | <input type="checkbox"/>       | <input type="checkbox"/>            | <input type="checkbox"/> | <input type="checkbox"/> | <input type="checkbox"/> |
| c) When in Vietnamese stores/restaurants                     | <input type="checkbox"/> | <input type="checkbox"/>            | <input type="checkbox"/>       | <input type="checkbox"/>            | <input type="checkbox"/> | <input type="checkbox"/> | <input type="checkbox"/> |
| d) When in non-Vietnamese stores/restaurants                 | <input type="checkbox"/> | <input type="checkbox"/>            | <input type="checkbox"/>       | <input type="checkbox"/>            | <input type="checkbox"/> | <input type="checkbox"/> | <input type="checkbox"/> |
| e) At the religious gatherings (temple/church)               | <input type="checkbox"/> | <input type="checkbox"/>            | <input type="checkbox"/>       | <input type="checkbox"/>            | <input type="checkbox"/> | <input type="checkbox"/> | <input type="checkbox"/> |
| f) During extra-curricular activities (e.g., sport/ music)   | <input type="checkbox"/> | <input type="checkbox"/>            | <input type="checkbox"/>       | <input type="checkbox"/>            | <input type="checkbox"/> | <input type="checkbox"/> | <input type="checkbox"/> |
| g) During cultural festivals (e.g., Tet/Vietnamese new year) | <input type="checkbox"/> | <input type="checkbox"/>            | <input type="checkbox"/>       | <input type="checkbox"/>            | <input type="checkbox"/> | <input type="checkbox"/> | <input type="checkbox"/> |
| h) During holidays in Vietnam                                | <input type="checkbox"/> | <input type="checkbox"/>            | <input type="checkbox"/>       | <input type="checkbox"/>            | <input type="checkbox"/> | <input type="checkbox"/> | <input type="checkbox"/> |

6. What language(s) *do you* use in the following **communication/media situations**?

|                                       | 1                        | 2                                   | 3                              | 4                                   | 5                        | 6                        | 7                        |
|---------------------------------------|--------------------------|-------------------------------------|--------------------------------|-------------------------------------|--------------------------|--------------------------|--------------------------|
| Situations                            | English always           | Mostly English sometimes Vietnamese | English and Vietnamese equally | Mostly Vietnamese sometimes English | Vietnamese always        | Another language         | Not applicable           |
| a) Social media (Facebook, Instagram) | <input type="checkbox"/> | <input type="checkbox"/>            | <input type="checkbox"/>       | <input type="checkbox"/>            | <input type="checkbox"/> | <input type="checkbox"/> | <input type="checkbox"/> |
| b) Reading the news (print or online) | <input type="checkbox"/> | <input type="checkbox"/>            | <input type="checkbox"/>       | <input type="checkbox"/>            | <input type="checkbox"/> | <input type="checkbox"/> | <input type="checkbox"/> |
| c) Reading magazines                  | <input type="checkbox"/> | <input type="checkbox"/>            | <input type="checkbox"/>       | <input type="checkbox"/>            | <input type="checkbox"/> | <input type="checkbox"/> | <input type="checkbox"/> |
| d) Reading books                      | <input type="checkbox"/> | <input type="checkbox"/>            | <input type="checkbox"/>       | <input type="checkbox"/>            | <input type="checkbox"/> | <input type="checkbox"/> | <input type="checkbox"/> |
| e) Listening to the radio             | <input type="checkbox"/> | <input type="checkbox"/>            | <input type="checkbox"/>       | <input type="checkbox"/>            | <input type="checkbox"/> | <input type="checkbox"/> | <input type="checkbox"/> |
| f) Listening to music                 | <input type="checkbox"/> | <input type="checkbox"/>            | <input type="checkbox"/>       | <input type="checkbox"/>            | <input type="checkbox"/> | <input type="checkbox"/> | <input type="checkbox"/> |
| g) Watching television                | <input type="checkbox"/> | <input type="checkbox"/>            | <input type="checkbox"/>       | <input type="checkbox"/>            | <input type="checkbox"/> | <input type="checkbox"/> | <input type="checkbox"/> |
| h) Watching movies                    | <input type="checkbox"/> | <input type="checkbox"/>            | <input type="checkbox"/>       | <input type="checkbox"/>            | <input type="checkbox"/> | <input type="checkbox"/> | <input type="checkbox"/> |

**Migration Information**

7. Which country were you born in? Which countries have you lived in?
8. How long have you been living in Australia?
9. How many years have you lived in an English-speaking country?
10. Which generation of immigrant are you?
  - a) **First generation** (You were born outside of Australia and arrived in Australia as an adult or late teen)

- b) **1.5 generation** (You were born outside of Australia but immigrated to Australia as a child or teenager)
  - c) **Second generation** (You were born in Australia to parents who immigrated to Australia)
  - d) **Third generation** (You were born in Australia and your grandparents immigrated to Australia)
  - e) Other (specify)
11. What is your **mother’s** first (home) language?  Vietnamese  English  Other (specify)
12. Which languages does **your mother** speak in order of proficiency?
13. What is your **father’s** first (home) language?  Vietnamese  English  Other (specify)
14. Which languages does **your father** speak in order of proficiency?

**Community**

15. Do you live near a large number of Vietnamese people?  Yes  No  Unsure
16. Is there a place in your community where Vietnamese people meet?  Yes  No  Unsure
17. How often do you attend local Vietnamese community activities/ gatherings/ events/ festivals/ religious events?  Never  Rarely  Sometimes  Very often  Always
18. Do you regularly visit Vietnam?  Yes  No
19. Do you intend to go back to live in Vietnam?  Yes  No  Unsure

**Language Maintenance**

20. What benefits are there for you maintaining Vietnamese?

|                                                  | Not important at all     | Somewhat important       | Important                | Extremely important      |
|--------------------------------------------------|--------------------------|--------------------------|--------------------------|--------------------------|
| a) Maintaining bonds with relatives              | <input type="checkbox"/> | <input type="checkbox"/> | <input type="checkbox"/> | <input type="checkbox"/> |
| b) Maintaining Vietnamese cultural identity      | <input type="checkbox"/> | <input type="checkbox"/> | <input type="checkbox"/> | <input type="checkbox"/> |
| d) Helping building friendships                  | <input type="checkbox"/> | <input type="checkbox"/> | <input type="checkbox"/> | <input type="checkbox"/> |
| e) Improving academic study (school, university) | <input type="checkbox"/> | <input type="checkbox"/> | <input type="checkbox"/> | <input type="checkbox"/> |
| f) Helping English learning                      | <input type="checkbox"/> | <input type="checkbox"/> | <input type="checkbox"/> | <input type="checkbox"/> |
| g) Having wider career options                   | <input type="checkbox"/> | <input type="checkbox"/> | <input type="checkbox"/> | <input type="checkbox"/> |
| h) Others (please provide details)               | <input type="checkbox"/> | <input type="checkbox"/> | <input type="checkbox"/> | <input type="checkbox"/> |

21. What do you do to maintain your Vietnamese language (e.g., watch Vietnamese movies)?

**Cultural Identity**

22. Please indicate where you see yourself along the scale below:

| 1                            | 2 | 3 | 4 | 5 | 6 | 7 | 8 | 9 | 10                           |
|------------------------------|---|---|---|---|---|---|---|---|------------------------------|
| I consider myself Vietnamese |   |   |   |   |   |   |   |   | I consider myself Australian |

23. To what extend do you agree with the following statements?

|                                                                           | Strongly disagree        | Somewhat disagree        | Neither disagree nor agree | Somewhat agree           | Strongly agree           | Not applicable           |
|---------------------------------------------------------------------------|--------------------------|--------------------------|----------------------------|--------------------------|--------------------------|--------------------------|
| a) It is important to maintain my Vietnamese culture, values and language | <input type="checkbox"/> | <input type="checkbox"/> | <input type="checkbox"/>   | <input type="checkbox"/> | <input type="checkbox"/> | <input type="checkbox"/> |
| b) It is important to maintain my Australian culture, values and language | <input type="checkbox"/> | <input type="checkbox"/> | <input type="checkbox"/>   | <input type="checkbox"/> | <input type="checkbox"/> | <input type="checkbox"/> |

<sup>a</sup> Questions were informed by Blake, Verdon and McLeod (2019), Cavallaro (2005), Hopf, McLeod and McDonagh (2016), Kang (2015), Lam (2011, p. 136), Luo and Wiseman (2000), Park (2007), Olson (2010), and Tannenbaum (2003).
